# Supplementary material for: Meta-Transcriptomic Comparison of the RNA Viromes of the Mosquito Vectors Culex pipiens and Culex torrentium in Northern Europe
Source: PubMed Central journal article supplement (PMC6893722; doi:10.3390/v11111033), 2019-11-06
Supplement: viruses-11-01033-s001.pdf [file viruses-11-01033-s001.pdf]

**Supplementary Table S1.** Information on collection site, year of collection and pool size for all *Cx. pipiens* and *Cx. torrentium* libraries.

| <b>Pool/Library</b> | <b>Species</b>        | <b>Number of mosquitoes</b> | <b>Region</b> | <b>Year</b> |
|---------------------|-----------------------|-----------------------------|---------------|-------------|
| L1                  | <i>Cx. torrentium</i> | 10                          | Dalälven      | 2009        |
| L2                  | <i>Cx. torrentium</i> | 10                          | Dalälven      | 2009        |
| L3                  | <i>Cx. pipiens</i>    | 10                          | Dalälven      | 2009        |
| L4                  | <i>Cx. pipiens</i>    | 15                          | Dalälven      | 2011        |
| L5                  | <i>Cx. pipiens</i>    | 15                          | Dalälven      | 2006        |
| L6                  | <i>Cx. pipiens</i>    | 15                          | Kristianstad  | 2006        |
| L7                  | <i>Cx. pipiens</i>    | 15                          | Kristianstad  | 2007        |
| L8                  | <i>Cx. pipiens</i>    | 50                          | Dalälven      | 2009        |
| L9                  | <i>Cx. torrentium</i> | 50                          | Dalälven      | 2009        |
| L10                 | <i>Cx. torrentium</i> | 50                          | Dalälven      | 2009        |
| L11                 | <i>Cx. torrentium</i> | 15                          | Dalälven      | 2011        |
| L12                 | <i>Cx. torrentium</i> | 15                          | Dalälven      | 2006        |

**Supplementary Table S2.** Number of reads mapped to each virus, *Wolbachia* and host genes per library per mosquito species.

|                                   |          | Culex torrentium |          |                 |          |          |          |             |             |          | Culex pipiens |          |                 |              |          |        |             |  |  |
|-----------------------------------|----------|------------------|----------|-----------------|----------|----------|----------|-------------|-------------|----------|---------------|----------|-----------------|--------------|----------|--------|-------------|--|--|
|                                   |          | SINV+            |          | SINV unscreened |          |          |          |             |             |          | SINV+         |          | SINV unscreened |              |          |        |             |  |  |
|                                   |          | Dalälven         | Dalälven | Dalälven        | Dalälven | Dalälven | Dalälven | Total reads | Virus fam   | Dalälven | Dalälven      | Dalälven | Kristianstad    | Kristianstad | Dalälven | reads  | Virus fam   |  |  |
| Virus                             | Lenght   | L1               | L2       | L9              | L10      | L11      | L12      |             |             | L3       | L4            | L5       | L6              | L7           | L8       |        |             |  |  |
| Sindbis virus                     | 11688    | 22942            | 26224    | 17              | 8        | 34       | 28       | 49253       | Alpha       | 99       | 41            | 14       | 82              | 17           | 5        | 258    | Alpha       |  |  |
| Nam Dinh virus                    | 20240    | 2516             | 19043809 | 3761            | 6393399  | 1805665  | 5621     | 27254771    | Nido        | 5378     | 3436          | 413559   | 4754            | 3897         | 4939     | 435963 | Nido        |  |  |
| Biggie virus                      | 9207     | 571              | 975342   | 678             | 1827928  | 1473     | 2069345  | 4875337     | Virga-Negev | 1820     | 771           | 867      | 746             | 955          | 1346     | 6505   | Virga-Negev |  |  |
| Negev virus                       | 9493     | 40               | 610317   | 47              | 116      | 110      | 113      | 610743      | Virga-Negev | 104      | 59            | 69       | 111             | 87           | 27080    | 27510  | Virga-Negev |  |  |
| Rinkaby virus                     | 14498    | 0                | 10       | 3               | 8        | 8        | 2        | 31          | Virga-Negev | 11       | 0             | 16       | 8               | 31577        | 8        | 31620  | Virga-Negev |  |  |
| Kerstinbo virus                   | 11280    | 13               | 13       | 11              | 568      | 7421     | 8        | 8034        | Endorna     | 6138     | 75226         | 11       | 4               | 6548         | 960      | 88887  | Endorna     |  |  |
| Forneby virus                     | 8255     | 0                | 4        | 0               | 174      | 0        | 0        | 178         | Endorna     | 2        | 5697          | 0        | 2               | 0            | 296      | 5997   | Endorna     |  |  |
| Osterfarnebo virus                | 5357     | 0                | 0        | 2               | 57       | 0        | 0        | 59          | Endorna     | 0        | 3586          | 0        | 0               | 0            | 228      | 3814   | Endorna     |  |  |
| Hallsjon virus                    | 2847     | 0                | 0        | 0               | 26       | 863      | 0        | 889         | Endorna     | 0        | 14            | 2        | 18              | 0            | 0        | 34     | Endorna     |  |  |
| Tarnsjo virus (variant 1)         | 7890     | 1675             | 0        | 525             | 1462     | 3969     | 169      | 7800        | Tymo        | 2        | 0             | 1        | 581             | 2            | 4        | 590    | Tymo        |  |  |
| Tarnsjo virus (variant 2)         | 7838     | 263              | 0        | 92              | 188      | 659      | 29       | 1231        | Tymo        | 0        | 0             | 2        | 3101            | 0            | 1        | 3104   | Tymo        |  |  |
| Culex associated luteo like virus | 2790     | 11               | 8        | 8               | 6        | 8        | 19       | 60          | Luteo       | 20       | 7             | 16       | 15              | 49241        | 5091     | 54390  | Luteo       |  |  |
| Berrek virus                      | 2807     | 0                | 0        | 2               | 0        | 0        | 2        | 4           | Luteo       | 0        | 0             | 0        | 0               | 0            | 647      | 647    | Luteo       |  |  |
| Fagle virus                       | 1453     | 0                | 97       | 0               | 0        | 0        | 0        | 97          | Luteo       | 0        | 0             | 0        | 0               | 0            | 0        | 0      | Luteo       |  |  |
| Mamma virus                       | 3151     | 24               | 31       | 41              | 57       | 38       | 43       | 234         | Luteo       | 77       | 35            | 38       | 51              | 77667        | 121044   | 198912 | Luteo       |  |  |
| Merida virus                      | 11785    | 79496            | 151310   | 97967           | 379747   | 467      | 733168   | 1442155     | Mononega    | 631      | 404           | 84195    | 266             | 278          | 14047    | 99821  | Mononega    |  |  |
| Culex mononega like virus 2       | 13316    | 15974            | 9868     | 12552           | 64366    | 34819    | 18395    | 155974      | Mononega    | 43       | 19249         | 3631     | 542             | 34           | 1094     | 24593  | Mononega    |  |  |
| Gysinge virus                     | 9532     | 3                | 2        | 4               | 9        | 456      | 6        | 480         | Mononega    | 4541     | 10696         | 3        | 6               | 3044         | 4        | 18294  | Mononega    |  |  |
| Culex mosquito virus 4            | 11954    | 2                | 28427    | 3               | 102      | 5        | 111      | 28650       | Mononega    | 4        | 0             | 4        | 11              | 2            | 6        | 27     | Mononega    |  |  |
| Culex mononega like virus 1       | 6604     | 0                | 0        | 2               | 2        | 0        | 0        | 4           | Mononega    | 0        | 0             | 0        | 0               | 0            | 3867     | 3867   | Mononega    |  |  |
| Valmbacken virus                  | 4315     | 652              | 2032906  | 6120            | 61293    | 1836     | 3084488  | 5187295     | Reo         | 2605     | 1017          | 887      | 788             | 938          | 1442     | 7677   | Reo         |  |  |
| Jotan virus                       | 9112     | 574              | 1158     | 690             | 410535   | 2626838  | 1198556  | 4238351     | Picornia    | 1996     | 3769          | 37724    | 763             | 810          | 1034     | 46096  | Picornia    |  |  |
| Ista virus                        | 9551     | 191424           | 36212    | 111084          | 389530   | 151179   | 216080   | 1095509     | Picornia    | 319      | 335           | 168      | 161             | 183          | 5433     | 6599   | Picornia    |  |  |
| Wuhan Mosquito Virus 4            | 2445     | 45               | 14421    | 22860           | 33992    | 20936    | 99110    | 191364      | Orthomyxo   | 26582    | 78317         | 72       | 13278           | 41609        | 3257     | 163115 | Orthomyxo   |  |  |
| Wuhan Mosquito Virus 6            | 2440     | 4                | 8        | 34              | 10       | 8        | 6        | 70          | Orthomyxo   | 4        | 4             | 26298    | 20816           | 105          | 88       | 47315  | Orthomyxo   |  |  |
| Vivassto virus                    | 2157     | 0                | 6        | 4               | 1841     | 250      | 10       | 2111        | Partiti     | 288      | 55158         | 11       | 16              | 5341         | 1255     | 62069  | Partiti     |  |  |
| Sombo virus                       | 1737     | 0                | 2        | 0               | 2        | 4        | 2        | 10          | Partiti     | 0        | 3615          | 2        | 0               | 0            | 724      | 4341   | Partiti     |  |  |
| Rasbo virus                       | 5974     | 0                | 0        | 218             | 384      | 302      | 1025     | 1929        | Bunya       | 2        | 2             | 0        | 0               | 0            | 2        | 6      | Bunya       |  |  |
| Kristianstad virus                | 5406     | 0                | 0        | 0               | 2        | 0        | 0        | 2           | Bunya       | 0        | 0             | 0        | 901             | 0            | 0        | 901    | Bunya       |  |  |
| Asum virus                        | 7184     | 0                | 2        | 18              | 21       | 1        | 3        | 45          | Bunya       | 2        | 9             | 4        | 14754           | 2            | 2        | 14773  | Bunya       |  |  |
| Salari virus                      | 6630     | 0                | 0        | 0               | 0        | 0        | 0        | 0           | Bunya       | 2        | 0             | 0        | 0               | 2            | 647      | 651    | Bunya       |  |  |
| Anjon virus                       | 6495     | 119              | 25565    | 6182            | 38367    | 432      | 31709    | 102374      | Phasma      | 36       | 24            | 45       | 24              | 10           | 30       | 169    | Phasma      |  |  |
| Gran virus                        | 5622     | 0                | 2        | 416             | 310      | 224      | 703      | 1655        | Qin         | 0        | 0             | 2        | 0               | 0            | 1        | 3      | Qin         |  |  |
| Nackenback virus                  | 6128     | 2                | 4        | 4               | 6        | 527      | 6        | 549         | Qin         | 4        | 23055         | 2        | 5               | 2928         | 5        | 25999  | Qin         |  |  |
| Vinslov virus                     | 5590     | 0                | 0        | 2               | 0        | 0        | 0        | 2           | Qin         | 0        | 14            | 334      | 1934            | 0            | 0        | 2282   | Qin         |  |  |
| Vitkovle virus                    | 5671     | 0                | 43       | 2               | 0        | 0        | 0        | 45          | Qin         | 0        | 0             | 0        | 790             | 0            | 0        | 790    | Qin         |  |  |
| Ahus virus                        | 7732     | 0                | 2        | 0               | 2        | 0        | 0        | 4           | Toti        | 0        | 10            | 182      | 1088            | 0            | 0        | 1280   | Toti        |  |  |
| Osta virus                        | 5398     | 0                | 2        | 0               | 0        | 0        | 0        | 2           | Toti        | 4        | 798           | 0        | 2               | 452          | 2        | 1258   | Toti        |  |  |
| Lindangsbacken virus              | 6171     | 0                | 6578     | 2               | 0        | 0        | 0        | 6580        | Toti        | 0        | 0             | 0        | 0               | 2            | 0        | 2      | Toti        |  |  |
| Salja virus                       | 1286     | 0                | 0        | 0               | 0        | 0        | 0        | 0           | Toti        | 0        | 67            | 0        | 0               | 72           | 0        | 139    | Toti        |  |  |
| Eskilstorp virus                  | 2933     | 0                | 0        | 0               | 4        | 2        | 4        | 10          | Chryso      | 3        | 0             | 0        | 2               | 9404         | 6        | 9415   | Chryso      |  |  |
| Wolbachia COX1                    | 1573     | 0                | 62       | 0               | 0        | 0        | 0        | 62          | Wolbachia   | 0        | 2             | 2        | 0               | 0            | 0        | 4      | Wolbachia   |  |  |
| Wolbachia WSP                     | 614      | 0                | 0        | 0               | 0        | 2        | 12       | 14          | Wolbachia   | 4        | 14            | 9        | 0               | 0            | 4        | 31     | Wolbachia   |  |  |
| Host COX1                         | 1506     | 586              | 265      | 322             | 2427     | 2254     | 3117     | 8971        | COX1        | 126      | 2529          | 317      | 2850            | 860          | 417      | 7099   | COX1        |  |  |
| Library                           | L1       | L2               | L9       | L10             | L11      | L12      |          |             |             | L3       | L4            | L5       | L6              | L7           | L8       |        |             |  |  |
| Total reads                       | 34150856 | 62820620         | 43914132 | 52916282        | 62936342 | 59016596 |          |             |             | 39231440 | 41210662      | 41328330 | 40762624        | 44703752     | 46526884 |        |             |  |  |
| Virus reads                       | 316350   | 22962373         | 263351   | 9604522         | 4658534  | 7458761  |          |             |             | 50717    | 285415        | 568159   | 65620           | 235207       | 194595   |        |             |  |  |
| 0.1% of total                     | 3415     | 6282             | 4391     | 5292            | 6294     | 5902     |          |             |             | 3923     | 4121          | 4133     | 4076            | 4470         | 4653     |        |             |  |  |
| Percent virus                     | 0.93     | 36.55            | 0.60     | 18.15           | 7.40     | 12.64    |          |             |             | 0.13     | 0.69          | 1.37     | 0.16            | 0.53         | 0.42     |        |             |  |  |
| Percent Cx COX1                   | 0.0017   | 0.0004           | 0.0007   | 0.0046          | 0.0036   | 0.0053   |          |             |             | 0.0003   | 0.0061        | 0.0008   | 0.0070          | 0.0019       | 0.0009   |        |             |  |  |
| Percent other                     | 99.07    | 63.45            | 99.40    | 81.85           | 92.60    | 87.36    |          |             |             | 99.87    | 99.31         | 98.63    | 99.84           | 99.47        | 99.58    |        |             |  |  |
| SUM                               | 100.00   | 100.00           | 100.00   | 100.00          | 100.00   | 100.00   |          |             |             | 100.00   | 100.00        | 100.00   | 100.00          | 100.00       | 100.00   |        |             |  |  |

SINV+ = Mosquito pool is positive for SINV  
 SINV unscreened = Mosquito pool has not been screened for SINV
